# Supplementary material
Source: PubMed Central journal article supplement (PMC2851954)
Supplement: 0914843107_pnas.200914843SI.pdf [file 0914843107_pnas.200914843SI.pdf]

# Supporting Information

Pegtel et al. 10.1073/pnas.0914843107

## SI Materials and Methods

**Cell Culture.** EBV-positive lymphoblastoid cell lines (LCLs) RN (kind gift of W. Stoorvogel, Utrecht, The Netherlands), IM1 (spontaneous LCL), X50-7 (gift of M. Rowe, University of Birmingham, Birmingham, UK), and EBV-negative B-cell line (BJAB) were cultured in RPMI-1640 (BioWhittaker), supplemented with 10% FBS (HyClone; Perbio Sciences), 100 U/mL penicillin G, 100  $\mu$ g/mL streptomycin sulfate, and 2 mM glutamine. HeLa cells were cultured in DMEM (BioWhittaker), supplemented with 10% FBS (HyClone; Perbio Sciences), 100 U/mL penicillin G, 100  $\mu$ g/mL streptomycin sulfate, and 2 mM glutamine.

**Exosome Isolation and Purification.** Exosomes were isolated from the supernatants of B-cell cultures by differential centrifugation as described previously (1). In short, LCLs for exosome culturing were washed in PBS and recultured for 48 h at a density of  $0.5 \times 10^6$  cells/mL in a total volume of 200 mL RPMI-1640, supplemented with 5% exosome-depleted FBS (1 h centrifugation at  $70,000 \times g$  in a SW28 Beckman swing rotor), 100 U/mL penicillin G, 100  $\mu$ g/mL streptomycin sulfate, and 2 mM glutamine. Cell death was analyzed routinely by trypan-blue exclusion, and cultures with  $\leq 95\%$  viability were not considered for exosome purification. The cell-culture medium was centrifuged at  $500 \times g$  for 10 min ( $2\times$ ),  $2,000 \times g$  for 15 min ( $2\times$ ), and  $10,000 \times g$  for 30 min ( $2\times$ ) to remove cells and cellular debris. The exosomes subsequently were pelleted from the medium by ultracentrifugation at  $70,000 \times g$  for 1 h, after which the pellet was washed in 15 mL PBS and pelleted again by ultracentrifugation at  $70,000 \times g$  for 1 h. The washed pellet was dissolved in PBS in a total volume of 200  $\mu$ L and analyzed by EM to confirm purity and the presence of exosomes. The total protein yield for a typical LCL exosome purification protocol was  $\sim 60$   $\mu$ g, as determined by BCA protein assay (Pierce). Further purification for initial EM analysis was performed using a sucrose cushion with a density of 1.13  $\mu$ g/mL. The exosome pellet was centrifuged overnight at  $100,000 \times g$ .

**Western Blot/Proteomics.** Proteomics on B cell-secreted exosomes was performed as previously reported (2). Briefly, bands were washed and dehydrated three times in 50 mM ammonium bicarbonate (ABC) (pH 7.9)/50 mM ABC + 50% acetonitrile (ACN). Subsequently, cysteine bonds were reduced with 10 mM dithiothreitol for 1 h at 56 °C and alkylated with 50 mM iodoacetamide for 45 min at room temperature in the dark. After two subsequent wash/dehydration cycles, the bands were dried 10 min in a vacuum centrifuge and incubated overnight with 0.06  $\mu$ g/ $\mu$ L trypsin at 25 °C. Peptides were extracted once in 1% formic acid and subsequently two times in 50% ACN in 5% formic acid to enable liquid chromatography-MS/MS analysis. MS/MS spectra were searched against the human IPI database 3.31 using Sequest version 27, and proteins were ranked using Scaffold 2 (Proteome Software). For Western blotting, lysates of purified exosomes were made, and equal amounts of protein were loaded on an SDS/PAGE gel.

**RNA Isolation.** Total cellular and exosomal RNA was isolated with TRIzol reagent (Invitrogen), according to the manufacturer's protocol. Because low RNA yields were expected from purified exosomes, exosomes were disrupted in 800  $\mu$ L of TRIzol reagent, and 5  $\mu$ L glycogen (Roche) was added to the aqueous phase before the isopropanol precipitation step according to the RNA isolation notes of the manufacturer's protocol. The amount, quality, and composition of isolated RNA was analyzed by the NanoDrop 1000 spectrophotometer (Thermo Scientific) and the Agilent 2100 Bioanalyzer

for total RNA (RNA 6000 nano kit), and the 2100 small RNA kit were used to assess the large and small RNA profiles in LCL cells and exosomes, respectively. To confirm that isolated RNA was confined within the lumen of exosomes, exosome preparations were treated with final concentrations at 10 ng/ $\mu$ L and 400 ng/ $\mu$ L RNase A (Sigma) for 45 min at 37 °C before TRIzol-mediated RNA extraction. RNA yield from exosomes secreted by  $10^8$  LCL cells typically was 1–2  $\mu$ g as determined by the NanoDrop.

**EBV-Encoded microRNA Detection Through Multiplex RT-PCR.** Quantitative multiplex EBV-microRNA (miRNA) RT-PCR was performed as previously described (3). This technique makes use of a stem-loop primer for RT, followed by TaqMan real-time PCR using miRNA-specific forward primers and probes and a universal reverse primer specific for the constant region of the stem-loop RT primer. Stem-loop RT primers for up to 10 EBV-miRNAs were combined so that the RT reaction contained a final concentration of 12.5 nM of each RT primer. TaqMan MicroRNA RT kit (Applied Biosystems) was used, and the reactions were incubated according to kit instructions. The volume of the RT reaction was adjusted according to the number of PCRs to be performed. All RT reactions, including a no-template control, were performed in duplicate. Real-time PCR primers and probes were designed for each EBV-miRNA as previously described (3). Each 10  $\mu$ L miRNA PCR included 1  $\mu$ L of RT product, 5  $\mu$ L of  $2\times$  IQ Supermix (Bio-Rad), 1.5  $\mu$ M forward primer, 0.7  $\mu$ M universal reverse primer, and 0.2  $\mu$ M TaqMan probe (Applied Biosystems). Typically, the final input for the PCR was  $\sim 1$ –10 ng of exosomal RNA. The samples were incubated on a Bio-Rad MyIQ cycler at 95 °C for 3 min, followed by 40 cycles of 95 °C for 15 s and 60 °C for 30 s. All real-time PCRs were performed from the same batch of RT product for each sample and were performed in duplicate.

**Exosome Transfer Studies.** LCLs were labeled with PKH67 green fluorescent membrane linker-dye (Sigma) according to the manufacturer's protocol. Purified exosomes (180  $\mu$ L) were labeled with PKH67 dye by adding 180  $\mu$ L Diluent C (Sigma linker kit) and 20  $\mu$ L diluted PKH67 dye. Labeled purified exosomes were washed in PBS and pelleted (1-h centrifugation at  $70,000 \times g$  in a SW28 Beckman swing rotor) and resuspended in a final volume of 200  $\mu$ L. PKH67-stained LCLs or purified exosomes were seeded into porous 3.0-, 1.0-, or 0.4- $\mu$ m 24-well transwell devices (Corning Costar) when indicated. Typically, 6-day-old differentiated monocyte-derived (immature) dendritic cells (MoDC) ( $CD14^-$ ,  $CD1a^+$  as determined by FACS) were placed in the bottom of a transwell with a 1- $\mu$ m pore size at a ratio of 5 LCL to 1 MoDC. With a pore size of 0.4  $\mu$ m, exosome transfer of dye to MoDC was observed only after 48 h of coculture. MoDC and LCL were cocultured for indicated times in Iscove's modified Dulbecco's medium (IMDM) (BioWhittaker). MoDC were analyzed for PKH67 positivity at 0, 6, and 24 h by FACS analysis after EDTA treatment for 10 min at 37 °C to dislodge the adherent MoDC and remove potentially attached noninternalized exosomes. In control experiments we found that either  $\gamma$ -irradiation, UV exposure, or treatment with Fas ligand induced a high percentage of cell death (30%) in PKH67-stained LCL, but induced cell death did not significantly increase PKH67 positivity or the mean fluorescence of cocultured MoDC after 24 h. Total RNA was isolated from a total of  $3 \times 10^5$  MoDC that were cocultured in separate wells for 24 and 48 h with  $5 \times 10^5$  (unstained) B95-8 (RN) LCL. EBV-encoded miRNA copy numbers in the cocultured MoDC were quantified by RT-PCR as described. Based on previous results (3) and FACS analysis, a significant contribution to EBV-encoded miRNAs ascribed to the continuous uptake of LCL exosomes by

MoDC through LCL contamination was excluded. Pharmacological stimulation of exosome release from PKH67-labeled LCL at 24 h was achieved by addition of the calcium ionophore monensin (4) for the last 3 h of coculture at nontoxic concentrations (10–30  $\mu\text{M}$ ).

**Primary Monocyte Isolation and Dendritic Cell Generation.** Peripheral blood mononuclear cells (PBMCs) from various donors were isolated by density centrifugation (Lymphoprep; Nycomed AS) from buffy coats obtained from healthy blood donors (Sanquin). The CD14<sup>+</sup> monocytes were isolated from PBMC using magnetic microbeads (Miltenyi Biotec). CD14<sup>+</sup> cells were cultured at a density of  $4.0 \times 10^5$  cells/mL for 6 days in the following culture medium: IMDM (BioWhittaker) supplemented with 10% FCS (HyClone), 50 U/mL penicillin-streptomycin (Invitrogen Life Technologies), 1.6 mM L-glutamine (Invitrogen Life Technologies), and 0.01 mM  $\beta$ -mercaptoethanol (2-ME; Merck) (complete medium) supplemented with 100 ng/mL GM-CSF (Schering-Plough) and 10 ng/mL IL-4 (R&D Systems) at 37 °C, 95% humidity, and 5% CO<sub>2</sub>. To induce dendritic cell (DC) maturation, medium of both conditions was enriched at day 6 with a maturation mixture (monocyte-conditioned medium mimic) containing 10 ng/mL recombinant human TNF- $\alpha$  (R&D Systems) and 1,000 U/mL recombinant human IL-6 (R&D Systems). For all experiments, immature MoDCs were used unless indicated.

**Flow Cytometry.** Immunophenotypic analysis of LCLs and MoDC differentiation and maturation was performed using FACS analysis (FACSCalibur; BD Biosciences). Cells were incubated at 4 °C for 30 min in PBS with 0.1% BSA and 0.01% NaN<sub>3</sub>, in the presence of appropriate dilutions of FITC- or PE-labeled mouse mAbs to CD83 (Coulter Immunotech), CD86, HLA-DR (BD Biosciences), CD1a, CD14, CD40, CD80, CD19 (BD Biosciences), and DC-specific intercellular adhesion molecule-grabbing nonintegrin (DC-SIGN; PharMingen). The cells were measured subsequently using the FACSCalibur and analyzed with CellQuest software (BD Biosciences). Results were expressed either as (geometric) mean fluorescence index (MFI) or as the percentage of positive cells.

**Confocal and Electron Microscopy.** For conventional EM, LCL were fixed with a mixture of 2% paraformaldehyde and 1% glutaraldehyde in 0.2 M cacodylate buffer (pH 7.4), postfixed with 1% OsO<sub>4</sub>, dehydrated in ethanol, and embedded in Araldite 6005 (Canemco Inc.). Ultrathin sections were viewed with a JEOL 1010 electron microscope after counterstaining with uranyl acetate. Purified exosomes (10  $\mu\text{L}$ ) were spotted on a grid before fixation. For immunofluorescent staining and confocal microscopy, MoDC that had internalized fluorescent PKH67-labeled exosomes were placed on glass cover slides by cytopsin, fixed in 4% paraformaldehyde in PBS for 15 min at room temperature, permeabilized with 0.1% Triton X-100 for 10 min at 4 °C, and blocked with 2% BSA for 1 h at room temperature. Nuclei were stained with TO PRO-3, and finally a coverslip was mounted with VECTASHIELD mounting medium (Vector Labs). Slides were analyzed by laser-scanning microscopy with a Leica TCS SP2 using Leica software.

**Cloning and Luciferase Reporter Assays.** Total cDNA from RN and BJAB cells was used to isolate the 3'UTRs of *LMP1* and *CXCL11*, respectively, by PCR. Forward primer 5'-ACGTACTAGTGCC-TTCTAGGCATTACCATGTC-3' and reverse primer 5'-ACG-TAAGCTTGCTGCATCACAAGTCACATCAA-3' were used for the 3'UTR of *LMP1* (GenBank accession number X01995)

and forward primer 5'-ACGTACTAGTGATATGAAGTCC-TGGAAAAGG-3' and reverse primer 5'-ACGTAAGCTTGC-GAAAGGTTGTGGTAGTTTAT-3' were used for the 3'UTR of *CXCL11* (GenBank accession number NM\_005409). PCR products were cloned into the SpeI and HindIII sites of pMir-REPORT vector (Applied Biosystems). The mutated 3'UTR of *CXCL11* was purchased from Genearth.

HeLa cells were cotransfected with pMir-3'UTR-LMP1 and a pCMV4 vector containing EBV BART cluster 1 or cluster 2 (kind gift from D. Hayward, Johns Hopkins School of Medicine, Baltimore) using Lipofectamine 2000 (Invitrogen). Cells were cotransfected with a plasmid containing an expression cassette for Gaussia luciferase for normalization. After 24 h, cells were lysed (Reporter Lysis Buffer; Promega), and luciferase activity was measured using a luminometer (Lumat LB9507; EG&G Berthold). Immature 6-day-old differentiated MoDC and HeLa were transfected with pMIR-3'UTR-LMP1 or pMIR-3'UTR-CXCL11 using an Amaxa Nucleofector according to the manufacturer's protocol. Cells were cotransfected with a plasmid containing an expression cassette for Gaussia luciferase, CSCW-Gluc (5) to normalize the Firefly luciferase levels expressed from the pMir-Report constructs, and/or a GFP control vector to determine transfection efficiency (typically ~50%). For longer-duration experiments, 25–100  $\mu\text{L}$  of purified RN or BJAB exosomes were added 5 h after transfection. We added similar and 2 $\times$  more BJAB exosomes to ensure that the amount of BJAB exosomes was not limiting and was comparable to RN exosomes, because we noticed that BJAB cultures secrete slightly less (~20%) exosomes in a 24- to 48-h period than RN cultures as measured by protein content. Internalization of exosomes by transfected MoDC was confirmed by addition of fluorescent purified PKH67-labeled RN exosomes and subsequent FACS analysis. After 16 h of incubation, an equal amount of RN or BJAB exosomes was added and incubated for an additional 3 h. Ultimately MoDC were lysed (Reporter Lysis Buffer; Promega), and luciferase activity was measured using a luminometer (Lumat LB9507; EG&G Berthold). Experiments were repeated three times; the data shown are representative of one experiment. In shorter time-point experiments (4–8 h), much smaller amounts (25–40  $\mu\text{L}$ ) of purified exosomes were added once, directly upon transfection, and luciferase activity was measured as described.

**Patients and Clinical Specimens.** Whole blood ( $\approx 10$  mL) was collected for routine diagnostic testing for plasma HIV-RNA load and CD4 T-cell counts from random asymptomatic HIV carriers visiting the Slotervaart Hospital (Amsterdam, the Netherlands) for routine check-up between 2004 and 2006. Blood not used for these purposes was used for EBV research purposes described herein. PBMCs were isolated using Ficoll and stored in liquid nitrogen until use. Approval for this study was obtained from the Medical Ethical Board of Slotervaart Hospital (Approval U/1859/0402). Only clinical specimens from adults who gave written informed consent were included in the study. B lymphocytes were isolated from PBMCs using Dynabeads M-450 CD19 (DynaL Biotech) according to the manufacturer's protocol. We designated the remaining cells as the non-B-cell fraction. When sufficient PBMCs were available, the non-B cells were separated further into CD3<sup>+</sup> T cells and non-B/non-T cells by FACS sorting. We determined the purity of isolated fractions by standard flow cytometry on a FACS Calibur Instrument (BD Biosciences). B-cell populations typically were ~99% CD19<sup>+</sup>, and non-B-cell fractions typically were ~3% CD19<sup>+</sup> compared with isotype controls.

1. Wubbolts R, et al. (2003) Proteomic and biochemical analyses of human B cell-derived exosomes. Potential implications for their function and multivesicular body formation. *J Biol Chem* 278:10963–10972.
2. Piersma SR, et al. (2009) Proteomics of the TRAP-induced platelet releasate. *J Proteomics* 72:91–109.

3. Cosmopoulos K, et al. (2009) Comprehensive profiling of Epstein-Barr virus microRNAs in nasopharyngeal carcinoma. *J Virol* 83:2357–2367.
4. Savina A, Furlán M, Vidal M, Colombo MI (2003) Exosome release is regulated by a calcium-dependent mechanism in K562 cells. *J Biol Chem* 278:20083–20090.
5. Wurdinger T, et al. (2008) A secreted luciferase for ex vivo monitoring of in vivo processes. *Nat Methods* 5:171–173.

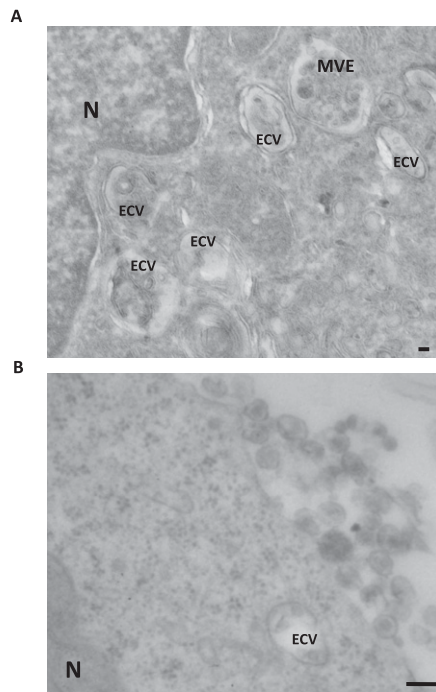

**Fig. S1.** Early and late endosomes in LCL cells and exosomes in BJAB cells. (A) EM image of early and late endosomal structures present in a typical LCL cell, including multivesicular endosomal intermediates (ECV) and a multivesicular endosome (MVE) that holds exosomal precursors known as “intraluminal vesicles” (ILV). N, nucleus. (B) ILVs are released as exosomes from BJAB cells when the limiting membrane of the MVE fuses with the plasma membrane. (Scale bar, 100 nm.)









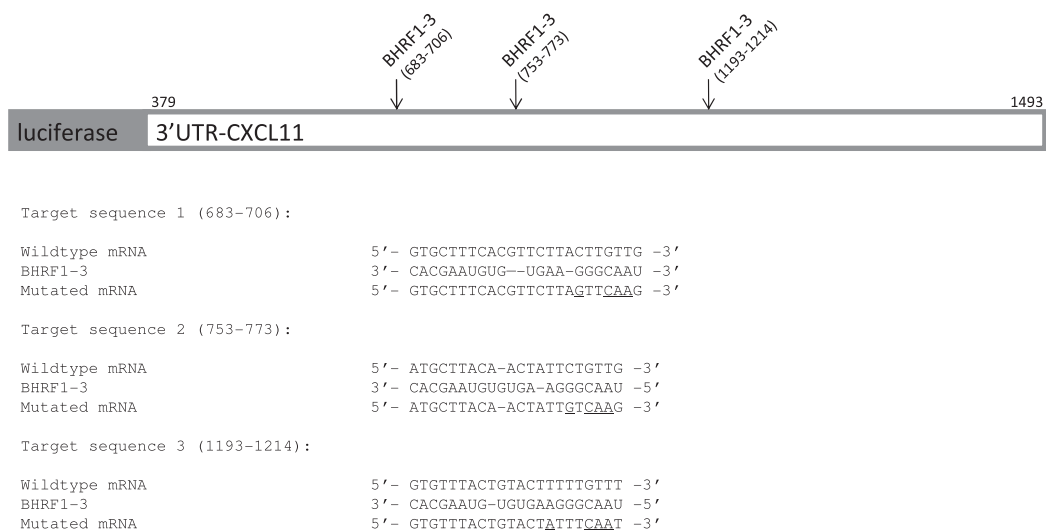

**Fig. S6.** Schematic representation of the wild-type CXCL11-luciferase reporter construct with BHRF1-3 EBV-miRNA target sites. Detailed below are the published sequences of target sites. Point mutations (underlined) were introduced in the mutated CXCL11-luciferase reporter construct to disrupt BHRF1-3 binding sites.

**Table S1. Enrichment of exosomal proteins is similar in exosomes from EBV-infected (LCL) and noninfected cells (BJAB)**

| Function             | MS/MS view: identified proteins (904)                    | Accession number | Molecular Mass | BJAB cell lysate | BJAB (EBV <sup>-</sup> ) exosome | LCL (EBV <sup>+</sup> ) exosome |
|----------------------|----------------------------------------------------------|------------------|----------------|------------------|----------------------------------|---------------------------------|
| Raft protein         | Raftlin (RFTN1)                                          | IPI00749454      | 63 kDa         | 0                | 11                               | 2                               |
| Raft protein         | Flotillin-1 (FLOT1)                                      | IPI00027438      | 47 kDa         | 0                | 7                                | 5                               |
| Raft protein         | Lactadherin (MFGE8)                                      | IPI00002236      | 43 kDa         | 0                | 2                                | 6                               |
| Exosome receptor     | Intercellular adhesion molecule 1 (ICAM1)                | IPI00008494      | 58 kDa         | 56% (1)          | 11                               | 10                              |
| Tetraspanin          | CD81 antigen (CD81)                                      | IPI00000190 (+1) | 26 kDa         | 1                | 3                                | 2                               |
| Endosomal GTPase     | Ras-related protein Rab-21 (RAB21)                       | IPI00007755      | 24 kDa         | 0                | 3                                | 3                               |
| Endosomal GTPase     | Ras-related protein Rab-10 (RAB10)                       | IPI00016513      | 23 kDa         | 3                | 5                                | 4                               |
| Endosomal GTPase     | Ras-related protein Rab-7a (RAB7A)                       | IPI00016342      | 23 kDa         | 5                | 6                                | 9                               |
| Endosomal GTPase     | Ras-related protein Rab-11B (RAB11B)                     | IPI00020436      | 24 kDa         | 2                | 7                                | 8                               |
| Antigen presentation | HLA class I histocompatibility antigen                   | IPI00026569      | 41 kDa         | 60% (1)          | 7                                | 9                               |
| Antigen presentation | MHC class II antigen(HLA-DQA1)                           | IPI00719648      | 29 kDa         | 60% (1)          | 4                                | 13                              |
| Antigen presentation | HLA class II histocompatibility antigen (DQB1)           | IPI00640031      | 30 kDa         | 0                | 3                                | 17                              |
| Antigen presentation | HLA-DRA                                                  | IPI00005171 (+1) | 29 kDa         | 2                | 2                                | 5                               |
| Mitochondrial        | Leucine-rich PPR motif-containing protein, mitochondrial | IPI00783271      | 158 kDa        | 27               | 0                                | 0                               |
| DNA repair           | DNA mismatch repair protein Msh2 (MSH2)                  | IPI00017303 (+1) | 105 kDa        | 6                | 0                                | 0                               |
| DNA repair           | DNA damage-binding protein 1 (DDB1)                      | IPI00293464      | 127 kDa        | 13               | 0                                | 0                               |

Table exported from Scaffold 2 software showing LC-MS/MS data. The numbers indicate the amount of unique peptide spectra that were identified. The percentage indicates the certainty that the protein has been identified correctly (in all cases 100%) except when indicated (for full details, see *SI Materials and Methods*).





**Table S2. Cont.**

| EBV-miRNA                                                              | Oligonucleotide | Sequence                                         |
|------------------------------------------------------------------------|-----------------|--------------------------------------------------|
| BART13                                                                 | RT              | CTCAACTGGTGTCTGGAGTCGGCAATTCAGTTGAGTCAGCCGT      |
|                                                                        | Forward         | ACACTCCAGCTGGGTGTAACCTGCCAGGGA                   |
|                                                                        | Probe           | TTCAGTTGAG TCAGCCGT                              |
| BART1-5                                                                | RT              | CTCAACTGGT GTCGTGGAGT CGGCAATTCA GTTGAG CTTGTATG |
|                                                                        | Forward         | ACACTCCAGC TGGG UAAGAGGACGCAGGCA                 |
|                                                                        | Probe           | TTCAGTTGAG CTTGTATG                              |
| BART1-5p                                                               | RT              | CTCAACTGGT GTCGTGGAGT CGGCAATTCA GTTGAG TGTATAGG |
|                                                                        | Forward         | ACACTCCAGC TGGG UCAAGUUCGCACUUC                  |
|                                                                        | Probe           | TTCAGTTGAG TGTATAGG                              |
| Quantitative EBV-DNA PCR                                               |                 |                                                  |
| EBNA                                                                   | Forward         | GCCGGTGTGTTCTGTATATGG                            |
|                                                                        | Reverse         | CAAAACCTCAGCAAATATATGAG                          |
|                                                                        | Probe 1         | TCTCCCCTTTGGAATGGCCCTG-fluorescein               |
|                                                                        | Probe 2         | LCRed640-ACCGGCCACACACTG                         |
| Semiquantitative RT-PCR for BAMHI-A (BART) transcripts and CXCL11 mRNA |                 |                                                  |
| BAR                                                                    | Forward         | AGAGACCAGGCTGCTAAACA                             |
|                                                                        | Reverse         | AACCAGCTTTCCTTCCGAG                              |
| CXCL1                                                                  | Forward         | GCTATAGCCTTGGCTGTGATAT                           |
|                                                                        | Reverse         | GCCTTGCTTCTCGATTGGG                              |
